# Supplementary material for: Spraying amorphous carbon coated zinc to prepare powder-based anodes for long-life zinc-ion batteries
Source: Royal Society of Chemistry journal article supplement (doi:10.1039/d4gc01812e), 2024-01-01
Supplement: d4gc01812e1.pdf [file d4gc01812e1.pdf]

**Spraying amorphous carbon coated zinc as powder-based anodes for long-life zinc-ion batteries**

Jiahao Tang<sup>a</sup>, Jiale Cao<sup>a</sup>, Yunxuan Jiang<sup>a</sup>, Siying Gou<sup>a</sup>, Ruiqi Yao<sup>b</sup>, Yingqi Li<sup>b\*</sup>,  
Botian Liu<sup>a\*</sup>

<sup>a</sup>Guangxi Key Laboratory of Electrochemical and Magneto-chemical Functional Materials, Department of Chemistry and Biological Engineering, Guilin University of Technology, Guilin 541004, China.

<sup>b</sup>Key Laboratory of Polyoxometalate and Reticular Material Chemistry of Ministry of Education, Faculty of Chemistry, Northeast Normal University, Changchun 130024, China

\* Corresponding author:

E-mail: btliau2018@glut.edu.cn (B.T. Liu); liyq164@nenu.edu.cn (Y.Q. Li)

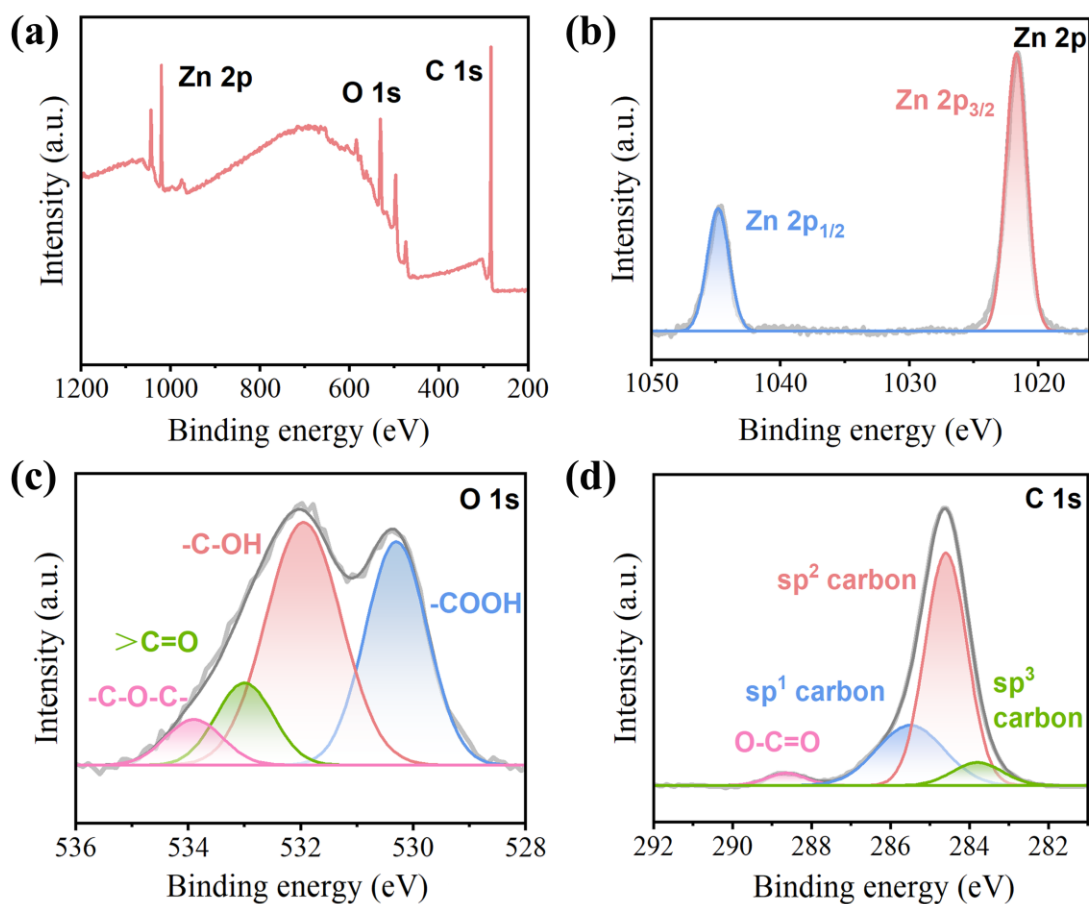

Figure S1. (a) XPS survey spectrum of the C@Zn-P anode. High resolution spectra of elements Zn 2p (b), O 1s (c), and C 1s (d).

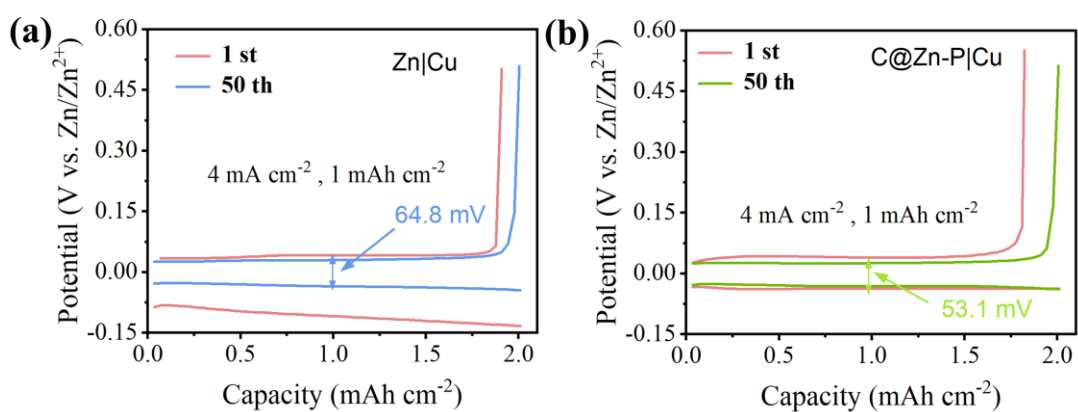

Figure S2. Voltage profiles for cycling performance of the Zn|Cu asymmetric cells (a) and C@Zn-P|Cu asymmetric cells (b) at current density of 1 mA cm<sup>-2</sup>.

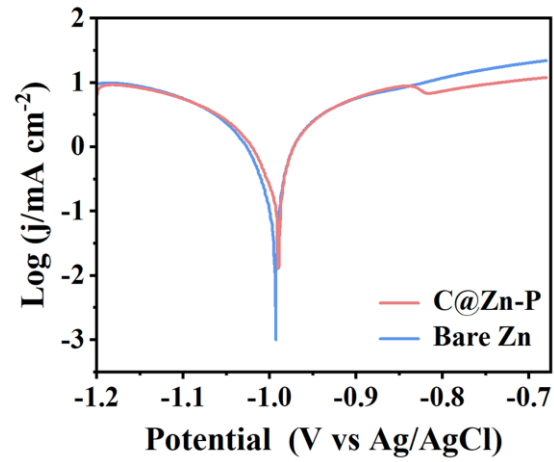

Figure S3. Linear polarization curves of the corrosion on bare Zn and C@Zn-P anode

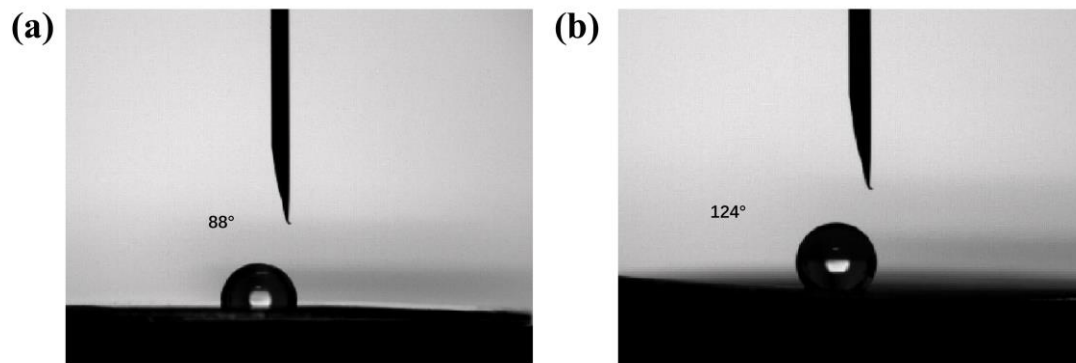

Figure S4. Contact angles of the bare (a) Zn and (b) C@Zn-P.

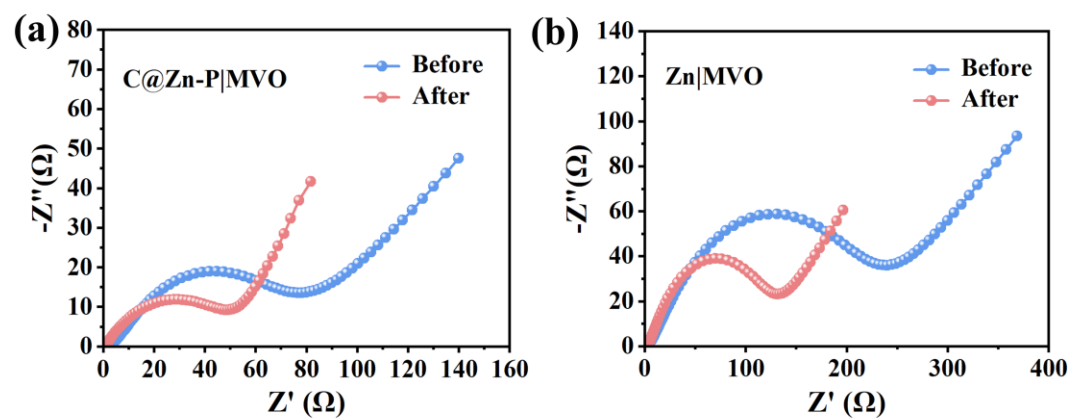

Figure S5. Nyquist plot comparing EIS spectra of C@Zn-P|MVO full cells (a) and Zn|MVO full cells (b).

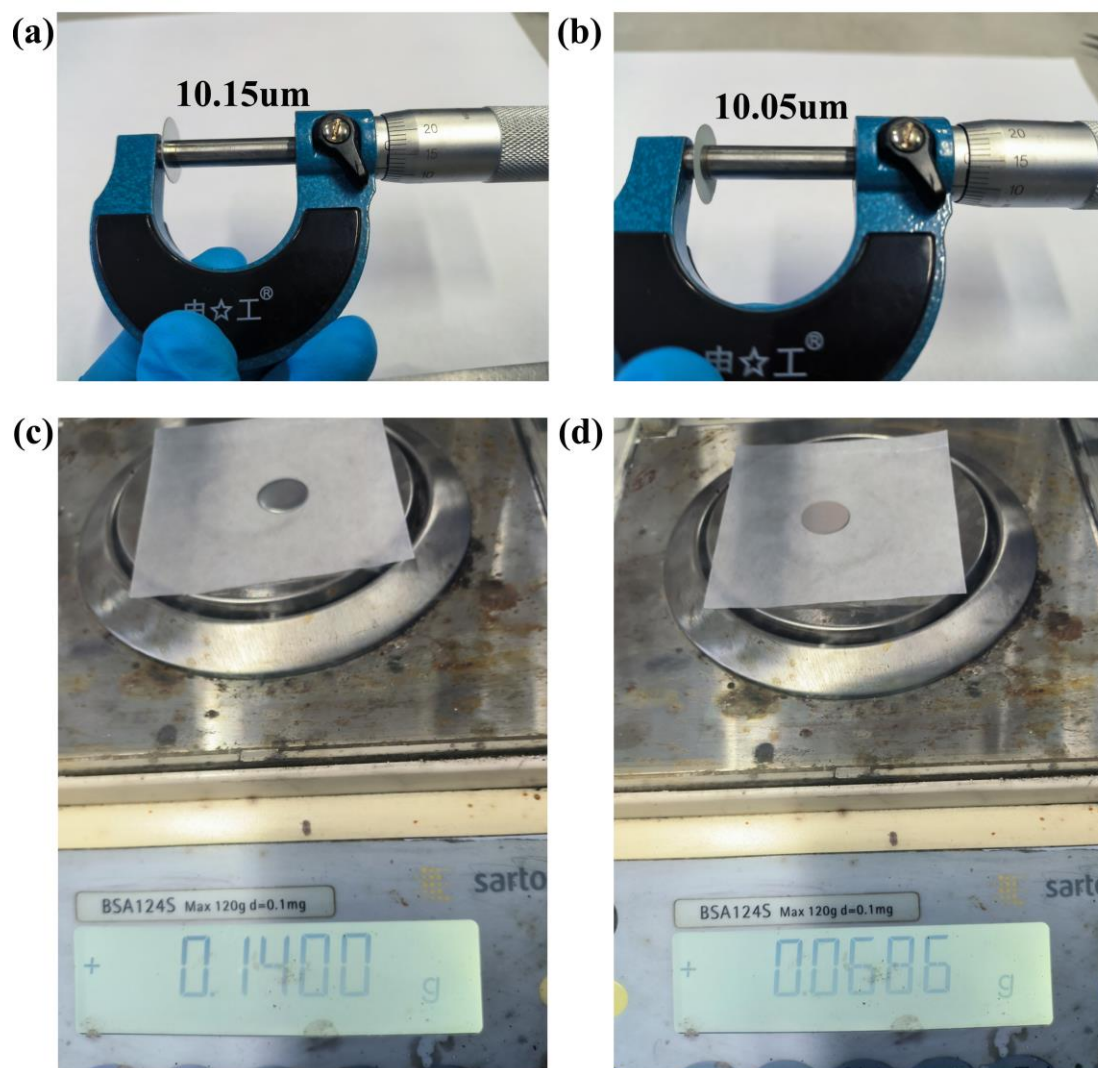

Figure S6. Optical photographs of weight and thickness measurements of (a,c) bare Zn and C@Zn-P anode (b,d).

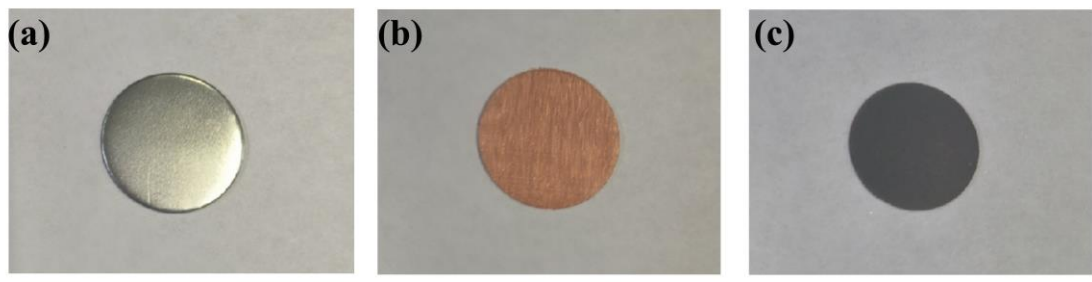

Figure S7. Optical photographs of bare Zn (a), Cu mesh substrate (b) and C@Zn-P anode (c).

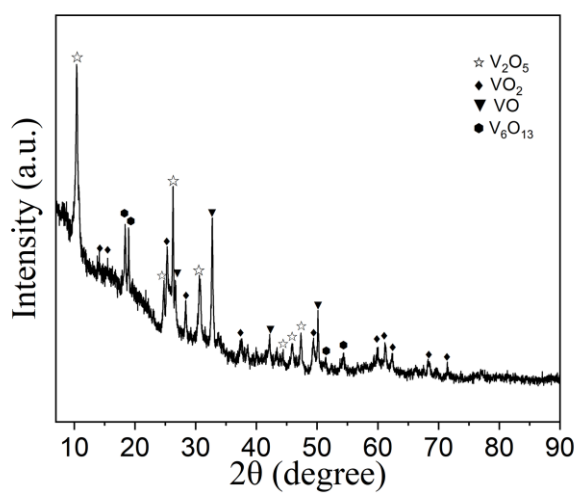

Figure S8. XRD patterns of the cathode material.
